# Supplementary figures and images for: A novel sensor of cysteine self-assembled monolayers over gold nanoparticles for the selective determination of epinephrine in presence of sodium dodecyl sulfate
Source: Royal Society of Chemistry journal article supplement (doi:10.1039/c2an16210e), 2012-01-01

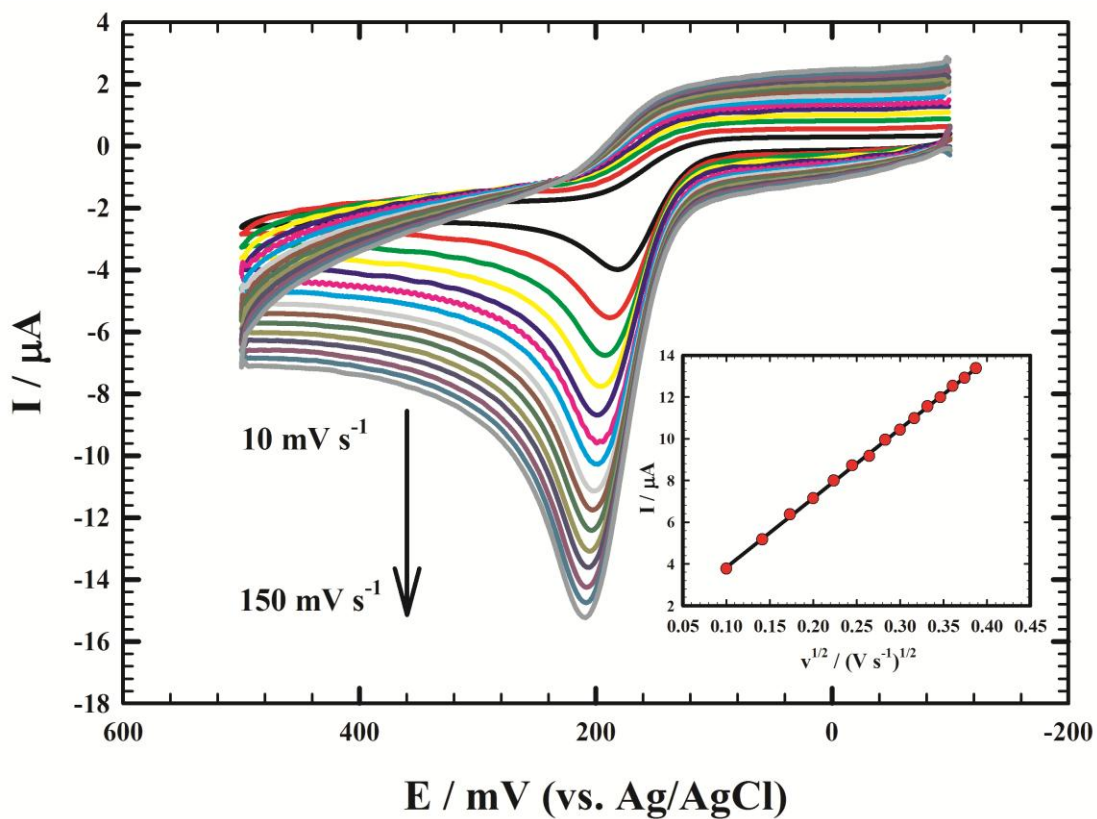

Supplement (1)

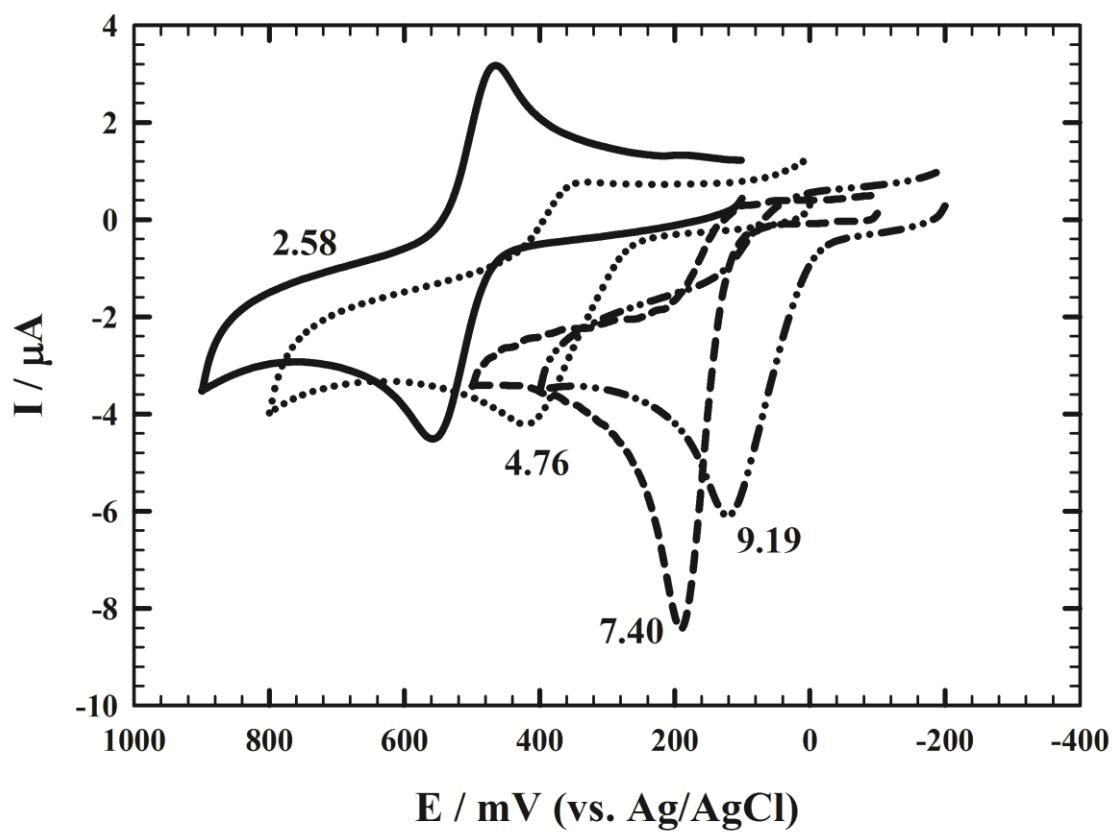

Supplement (2)

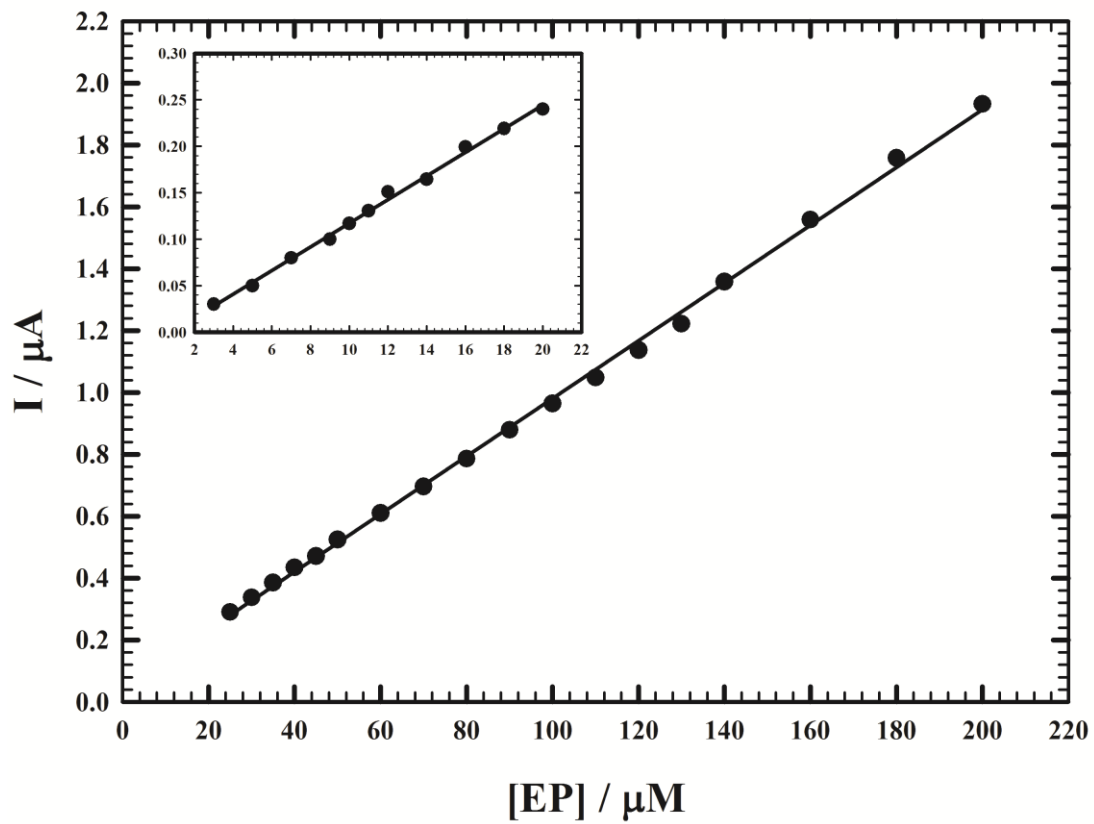

Supplement (3)

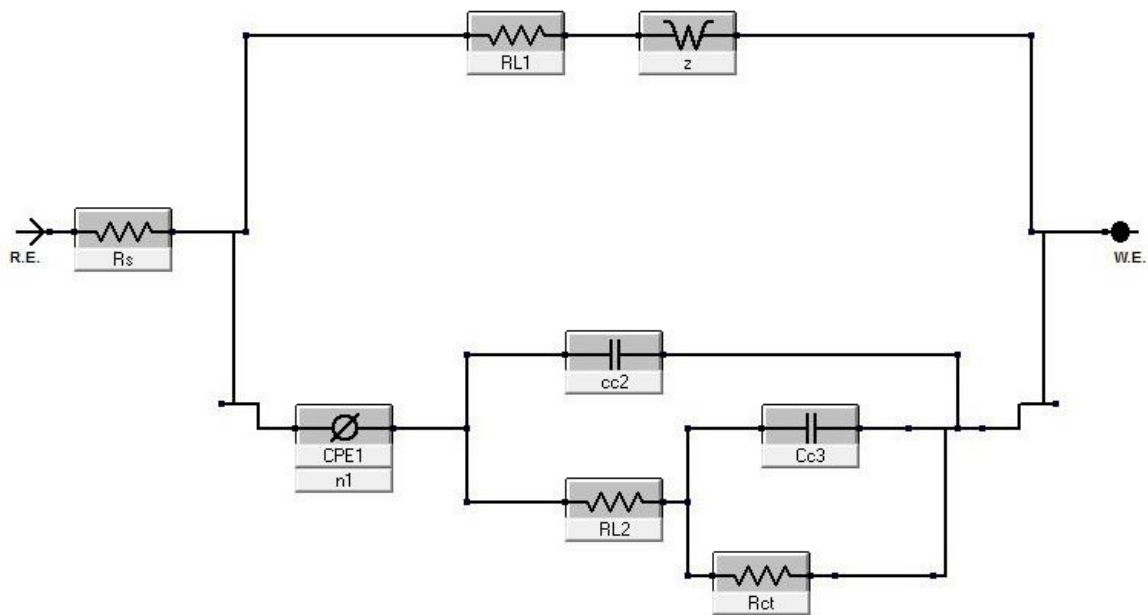

**Supplement (4)**

Supplement: c2an16210e.pdf [file c2an16210e.pdf]
